# Supplementary material for: NAD+-boosting agent nicotinamide mononucleotide potently improves mitochondria stress response in Alzheimer’s disease via ATF4-dependent mitochondrial UPR
Source: PubMed Central journal article supplement (PMC11470026; doi:10.1038/s41419-024-07062-1), 2024-10-11

# Western blot full scans

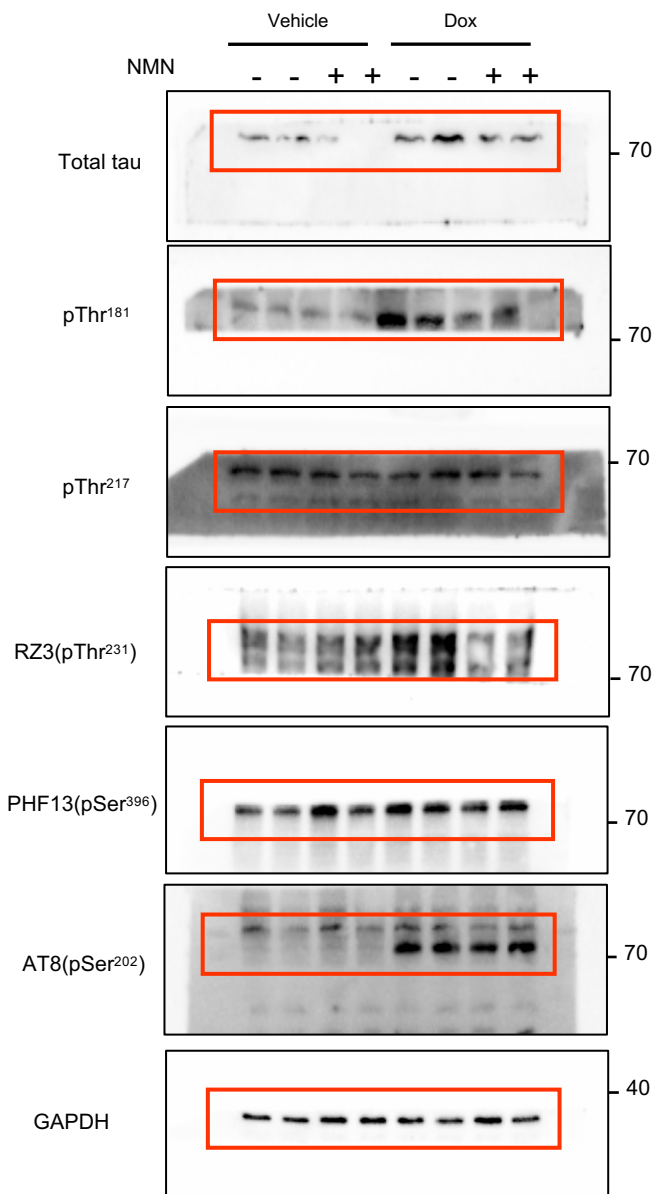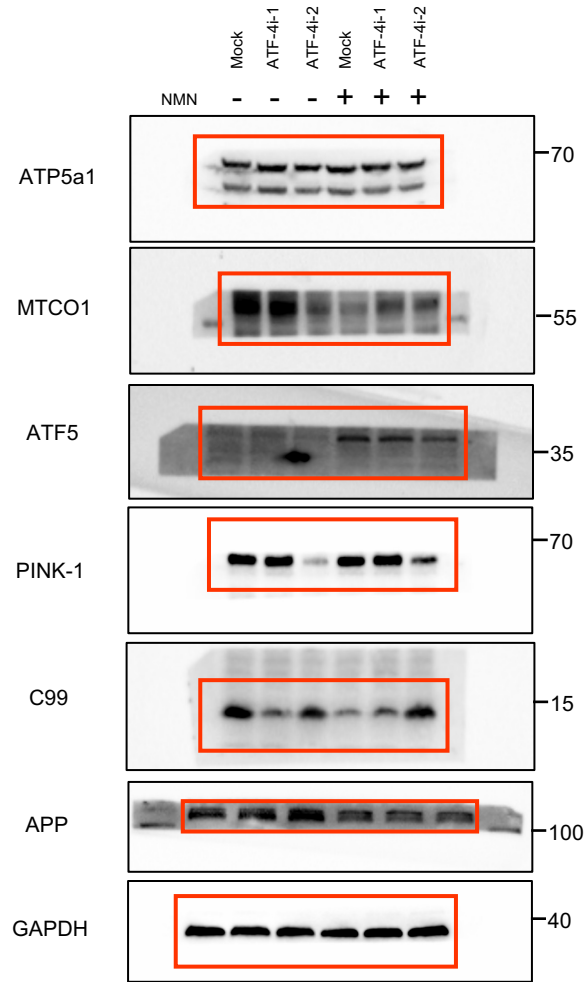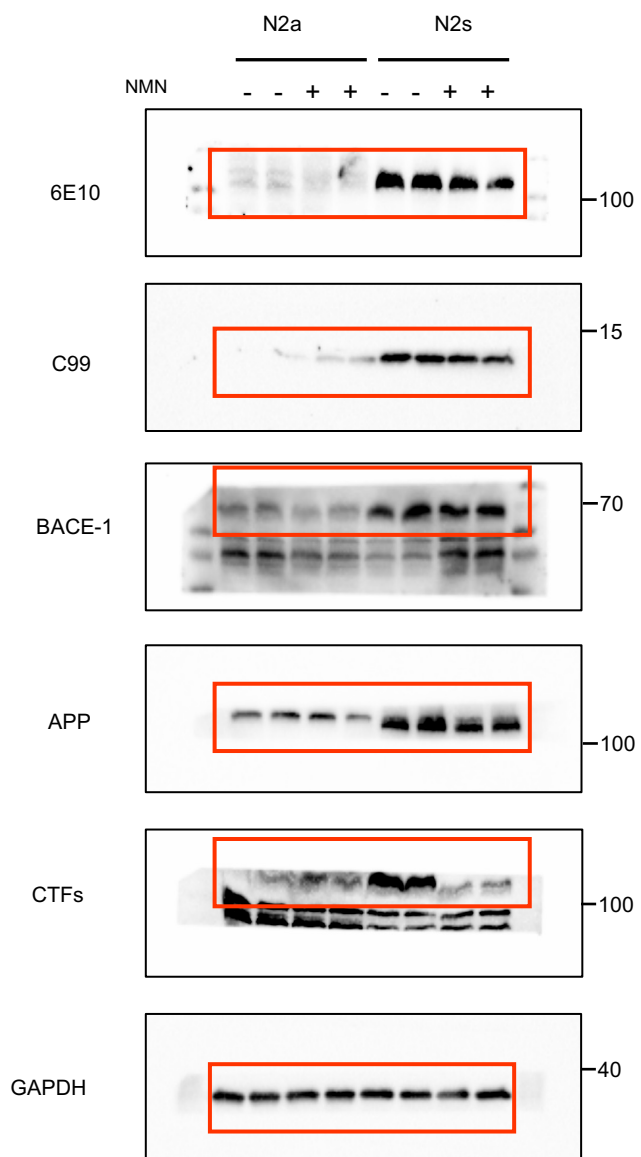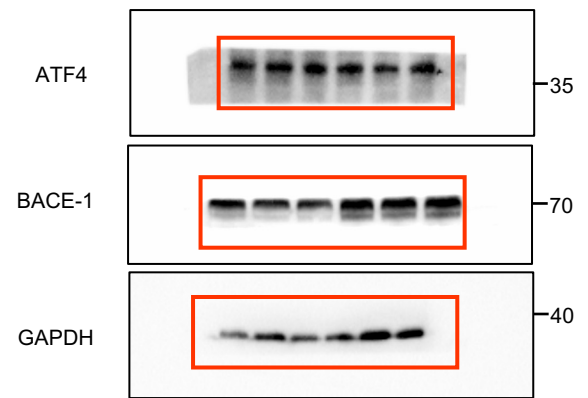

**Western blot full scans**

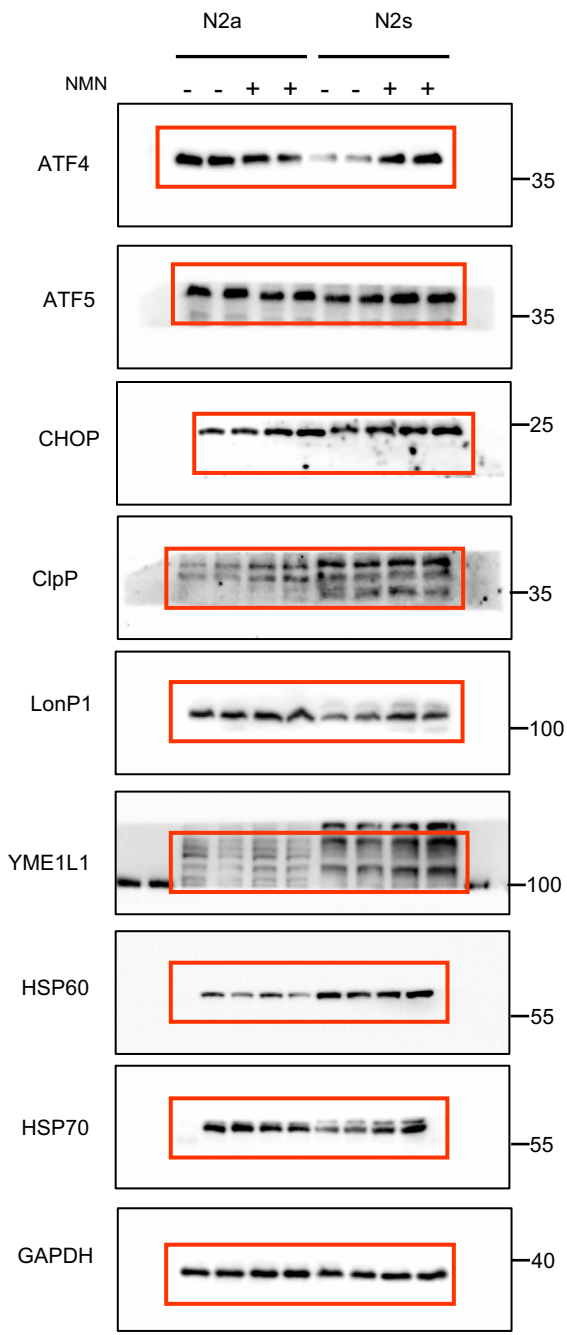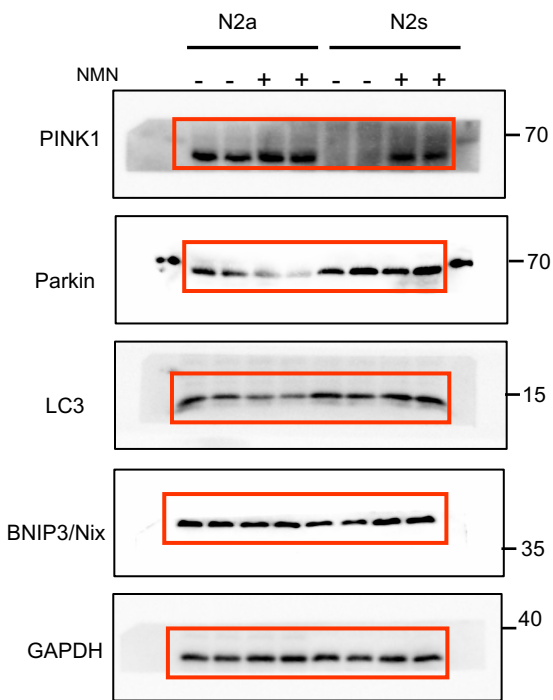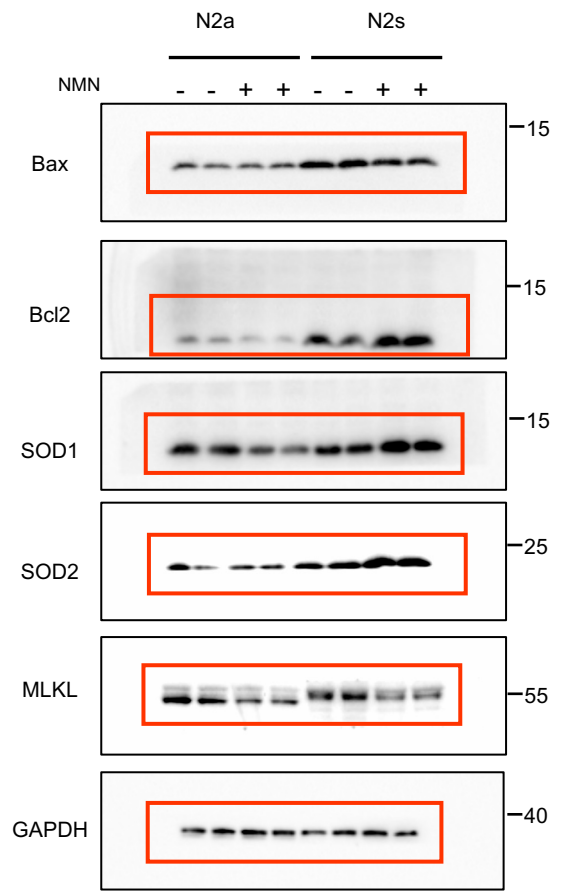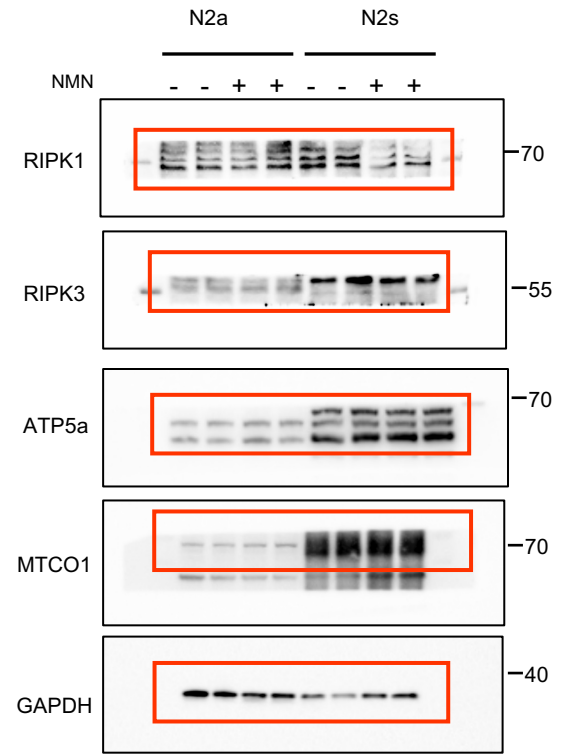

# Western blot full scans

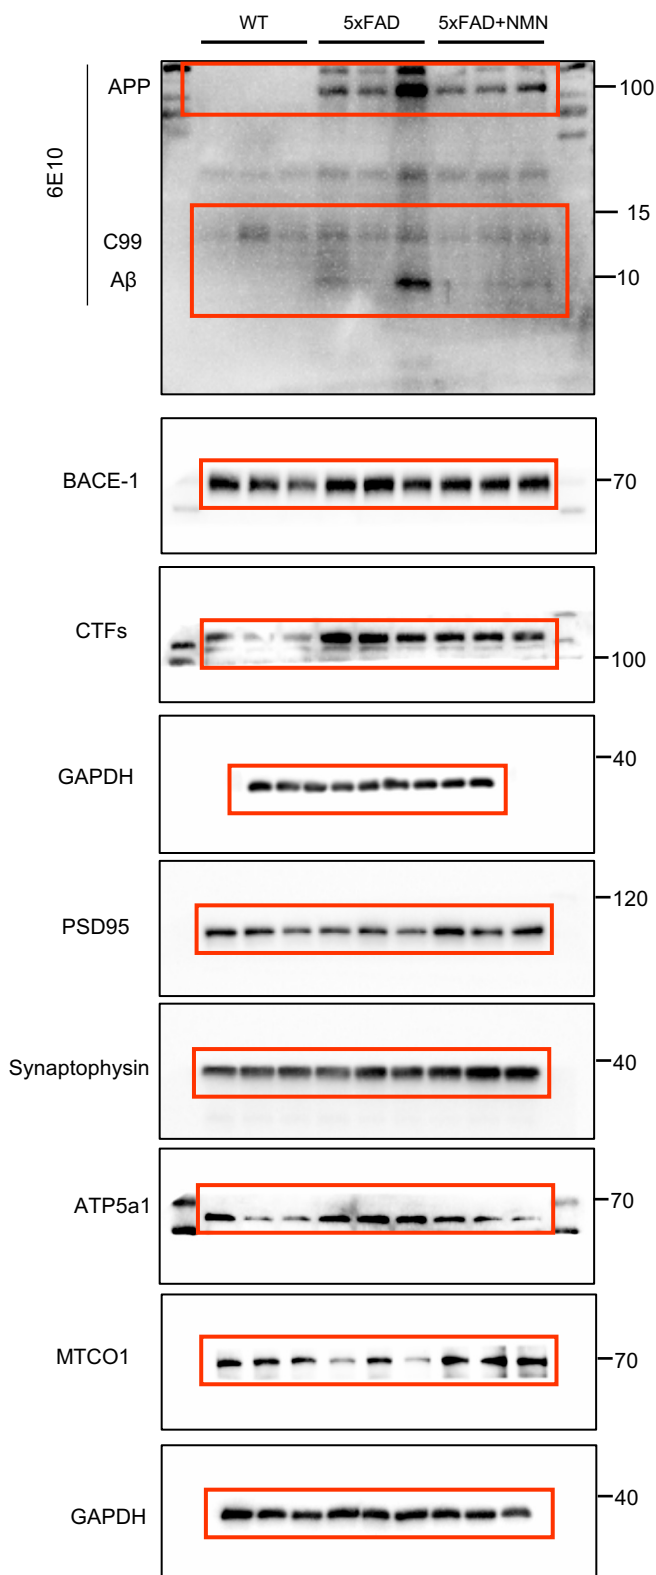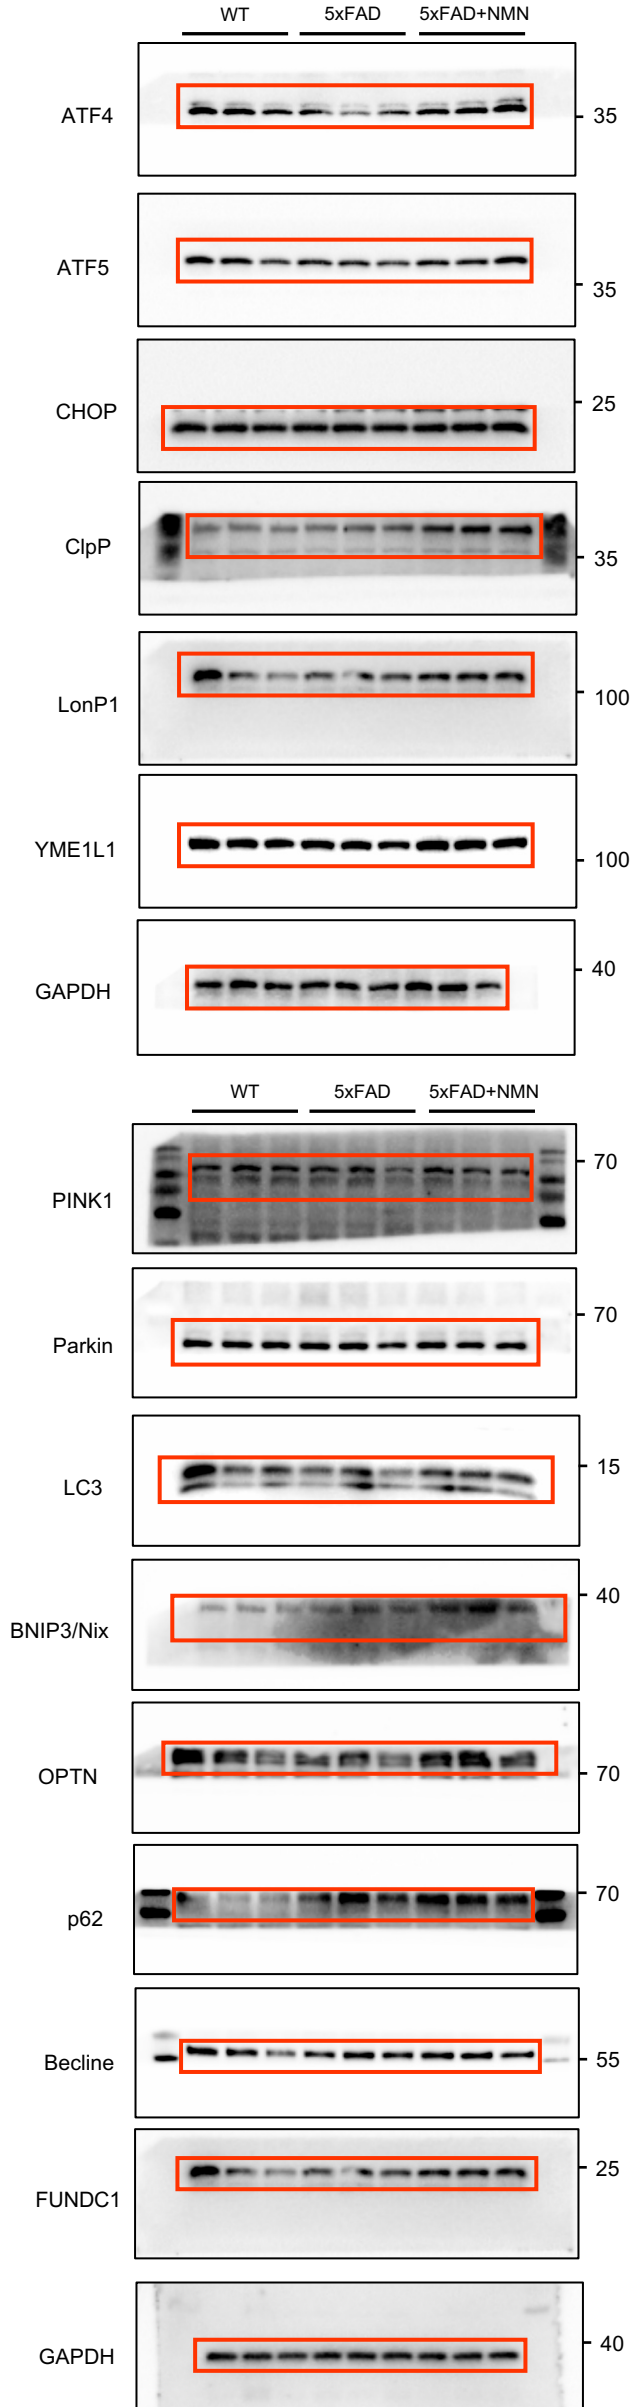

Western blot full scans

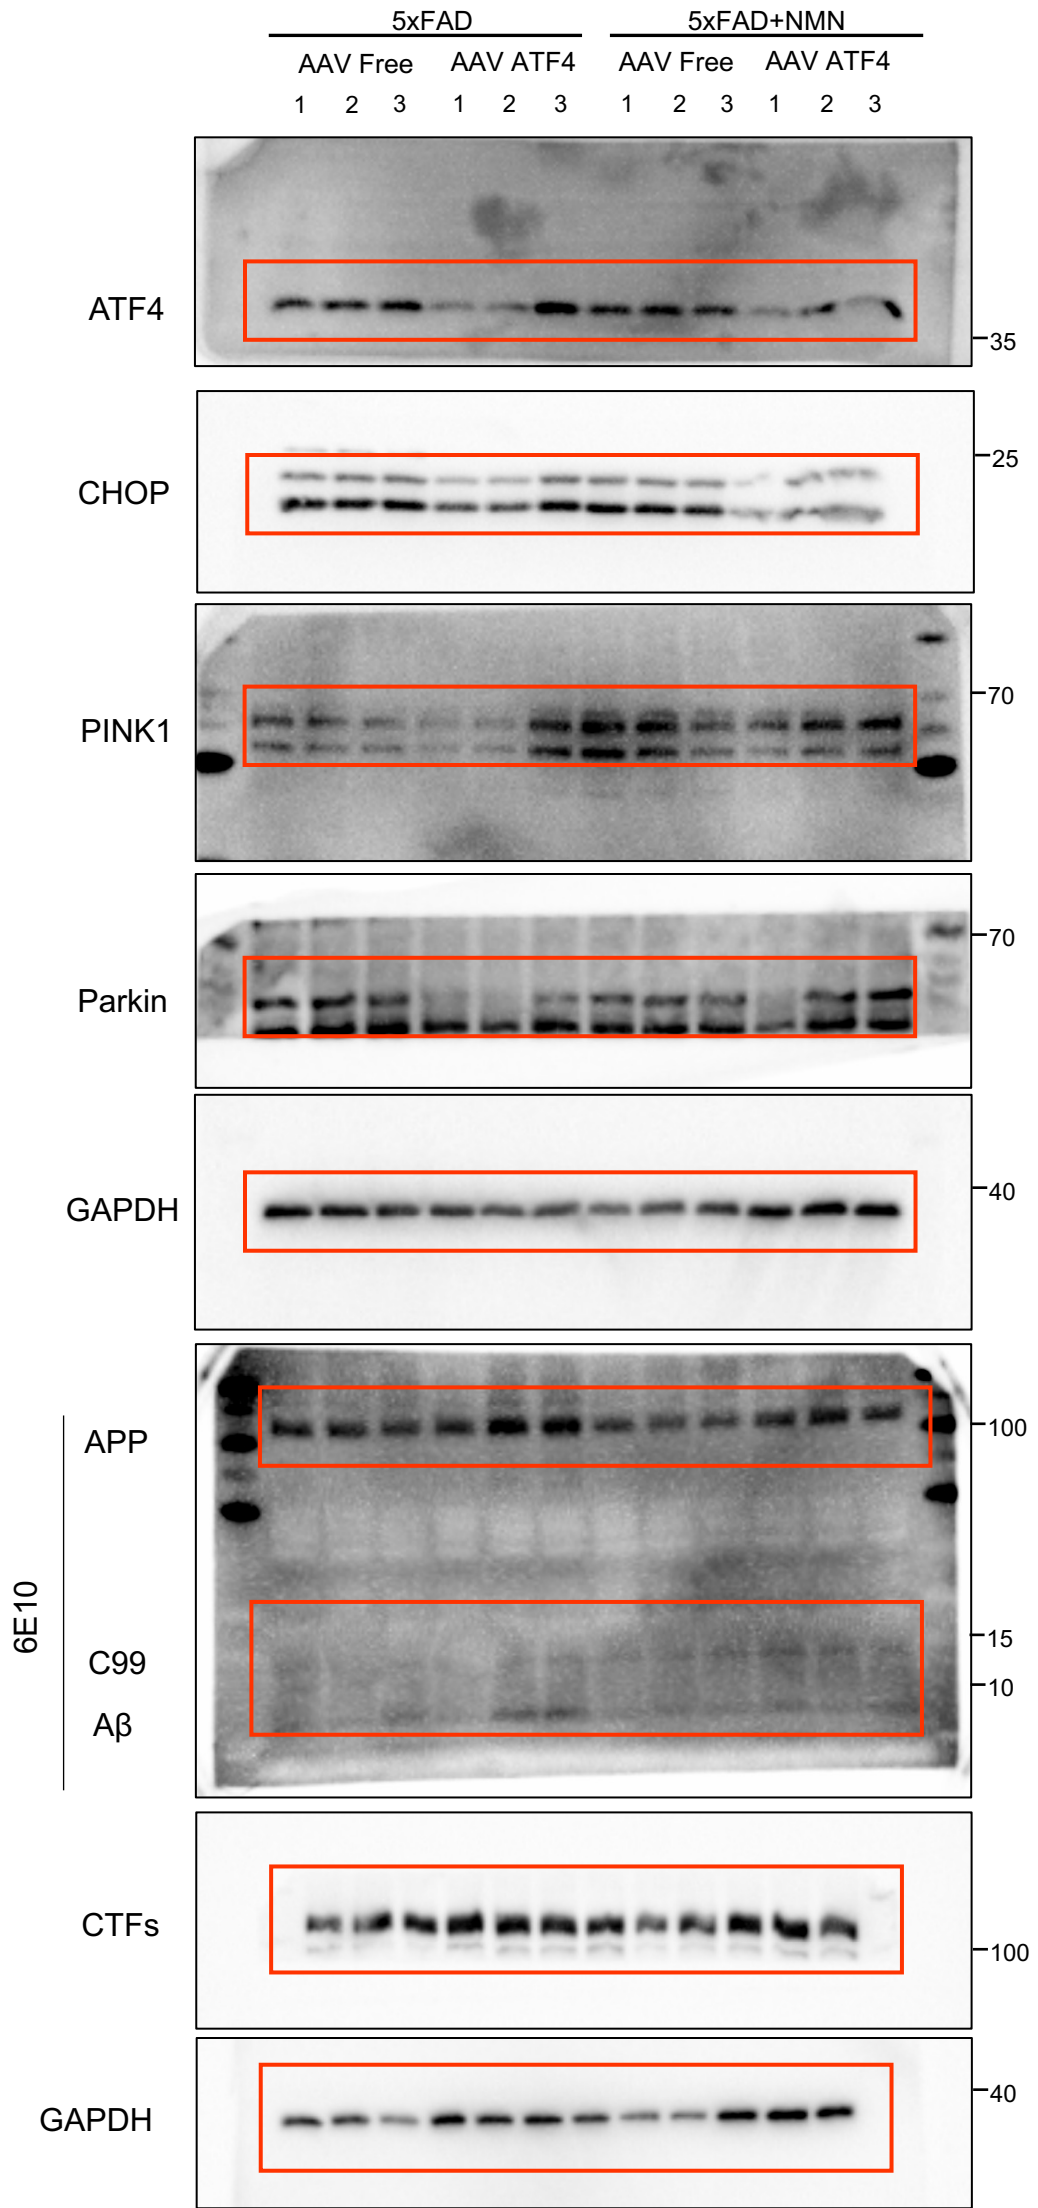

Supplement: 41419_2024_7062_MOESM2_ESM.pdf [file 41419_2024_7062_MOESM2_ESM.pdf]
